# Supplementary material for: Tanshinone IIA attenuates atherosclerosis via inhibiting NLRP3 inflammasome activation
Source: PubMed Central journal article supplement (PMC7835056; doi:10.18632/aging.202202), 2020-11-16
Supplement: aging-13-202202-s002.pdf [file aging-13-202202-s002.pdf]

## SUPPLEMENTARY TABLES

**Supplementary Table 1. qRT-PCR primers.**

| Genes | Primers sequences (5'→3') |                        | Size (bp) | Accessory No.  |
|-------|---------------------------|------------------------|-----------|----------------|
|       | Forward                   | Reverse                |           |                |
| IL-1β | AATGCCACCTTTTGACAGTGATG   | GGAAGGTCCACGGGAAAGAC   | 224       | NM_008361.4    |
| TNFα  | AGGCACTCCCCAAAAGATG       | CCACTTGGTGGTTTGTGAGTG  | 213       | NM_001278601.1 |
| IL-6  | GCCTTCTGGGACTGATGCT       | TGGAAATTGGGGTAGGAAGGAC | 475       | NM_031168.2    |
| IL-18 | GGCTGCCATGTCAGAAGACT      | GTCTGGTCTGGGGTTCAGTG   | 239       | NM_008360.2    |
| NLRP3 | CTACGGCCGTCTACGTCTTC      | GGCAAAGAGGAATCGGACA    | 438       | NM_145827.4    |
| LOX-1 | GCGAACCTTACTCAGCAGGA      | GGGCCCATGGAAGAGGTAAC   | 546       | NM_138648.2    |
| CD36  | GGAGGCATTTCTATGCCAGT      | CTGCTGTTCTTTGCCACGTC   | 176       | NM_001159556.1 |
| SR-A1 | TGTGGCTCTACCCCTCCTAC      | GCAGATCTTGTGGACAGCCT   | 231       | NM_001008422.1 |
| Nrf2  | CCTCTGTCACCAGCTCAAGG      | TTCTGGGCGGCGACTTTATT   | 323       | NM_010902.4    |

**Supplementary Table 2. Small interfering RNA target sequences and double-strand DNA for generating siRNAs.**

| Genes | Target sequence            | Location  | Double-stranded DNA designed for insertion into cloning vector*                                                                         |
|-------|----------------------------|-----------|-----------------------------------------------------------------------------------------------------------------------------------------|
| LOX-1 | GGTGTGTGACAGTGACC<br>CTTAT | 185-205   | 5' CCGGGTGTGTCAGTGACCCTTATCTCGAGATAAGGGTCACTGACAACAC<br>CTTTTTG<br>CCACAACAGTCACTGGGAATAGAGCTCTATTCCCAGTGACTGTTGTGGAAAACTTA<br>A5'      |
| CD36  | GGAGCCATCTTTGAG<br>CCTTCA  | 818-838   | 5' CCGGGGAGCCATCTTTGAGCCTTCACTCGAGTGAAGGCTCAAAGATGGCTCC<br>TTTTTG<br>CCTCGGTAGAAACTCGGAAGTGAAGTCACTTCCGAGTTTCTACCGAGGAAAACTTA<br>A5'    |
| SR-A1 | GGGATAGGTCATCC<br>AAGAAGA  | 2386-2406 | 5' CCGGGGATAGGTCATCCAAGAAGACTCGAGTCTTCTTGGATGACCTATCCC<br>TTTTTG<br>CCCTATCCAGTAGGTTCTTCTGAGCTCAGAAGAACCCTACTGGATAGGGAAAACTTA<br>A5'    |
| Nrf2  | GCAGGACATGGATT<br>TGATTGA  | 297-317   | 5' CCGGGCAGGACATGGATTGATTGACTCGAGTCAATCAAATCCATGTCCTGC<br>TTTTTG<br><br>CGTCCTGTACCTAAACTAACTGAGCTCAGTTAGTTTAGGTACAGGACGAAAACTTA<br>A5' |
| PPARγ | GCATTTCTGCTCCAC<br>ACTATG  | 618-639   | 5' CCGGGCATTCTGCTCCACACTATGCTCGAGCATAGTGTGGAGCAGAAATGC<br>TTTTTG<br><br>CGTAAAGACGAGGTGTCATACGAGCTCGTATCACACCTCGTCTTTACGAAAACTTA<br>A5' |

\* Cloning sites: Age I/EcoR I.
