# Supplementary material for: Tanshinone IIA attenuates atherosclerosis via inhibiting NLRP3 inflammasome activation
Source: Aging (Albany NY). 2020 Nov 16;13(1):910–32. doi: 10.18632/aging.202202 (PMC7835056; doi:10.18632/aging.202202)
Supplement: Supplementary Figures [file aging-13-202202-s001.pdf]

## SUPPLEMENTARY FIGURES

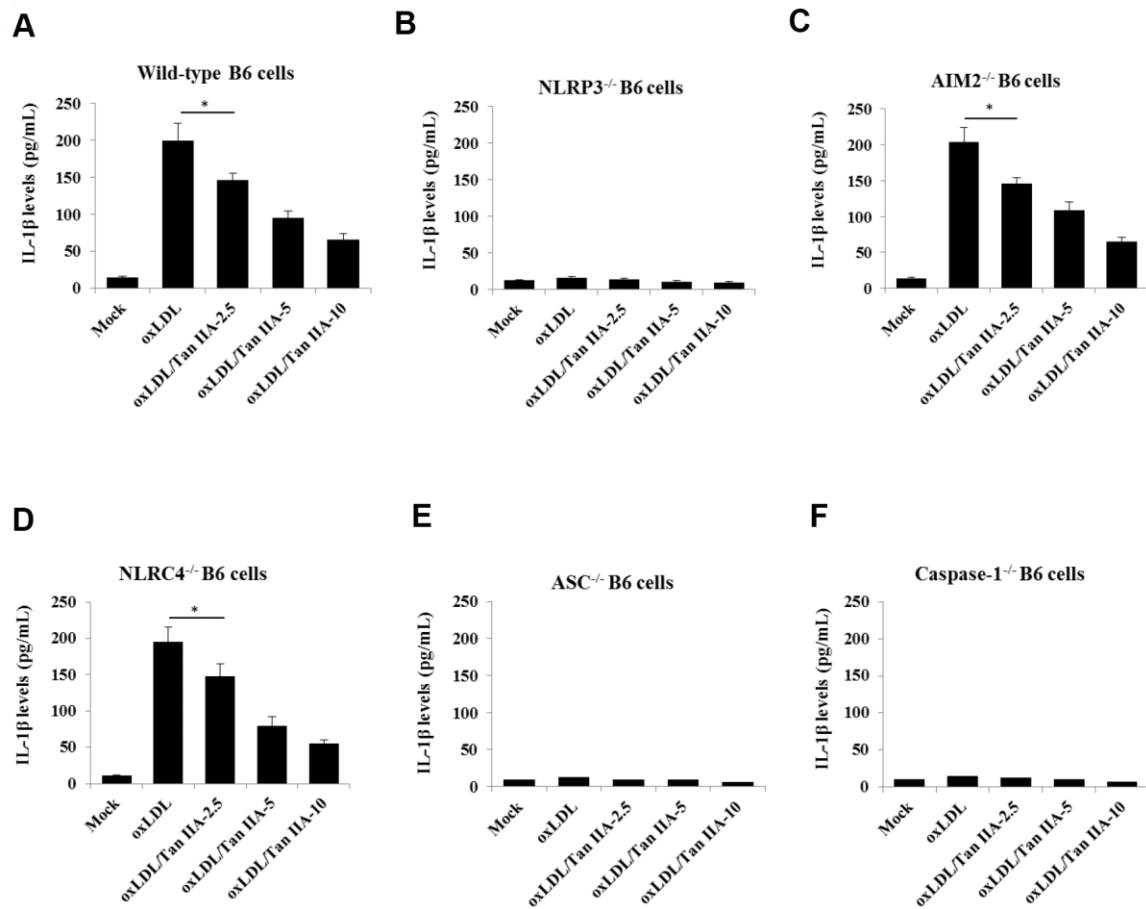

**Supplementary Figure 1. Inhibitory effects of Tan IIA on IL-β release from oxLDL-induced different sensor gene-knockout macrophages. (A–F) Wild-type, NLRP3<sup>-/-</sup>, AIM<sup>-/-</sup>, NLRC4<sup>-/-</sup>, ASC<sup>-/-</sup> and caspase 1<sup>-/-</sup> mouse B6 macrophages.**

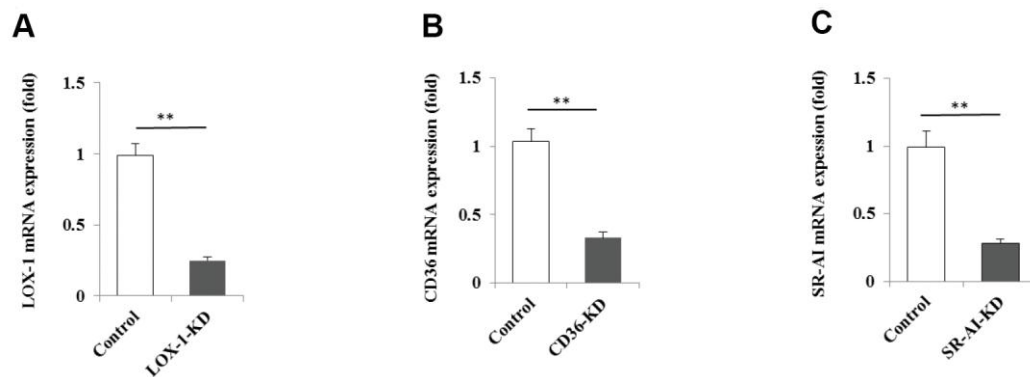

**Supplementary Figure 2. Effects of the specific siRNAs on LOX-1, CD36 and SR-A1 expressions. (A–C) LOX-1, SR-A1 and CD36 expressions measured by qRT-PCR in the macrophages under the treatments with their siRNA, respectively.**

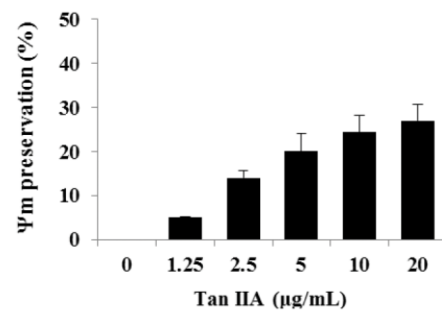

Supplementary Figure 3. Inhibition rates of Tan IIA on hypotonic solution-induced rat erythrocyte hemolysis.

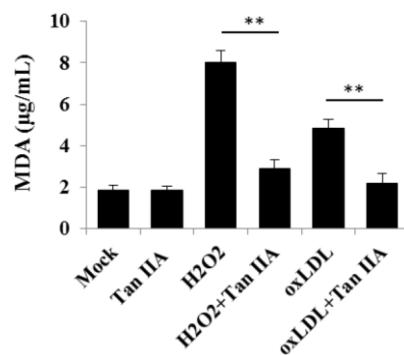

Supplementary Figure 4. Tan IIA inhibition on lipid peroxidation induced by H2O2.
